# Supplementary material
Source: publisher site journal article supplement (https://www.dovepress.com/article/431207)
Supplement: Supplementary file 1 [file get_supplementary_file.php]

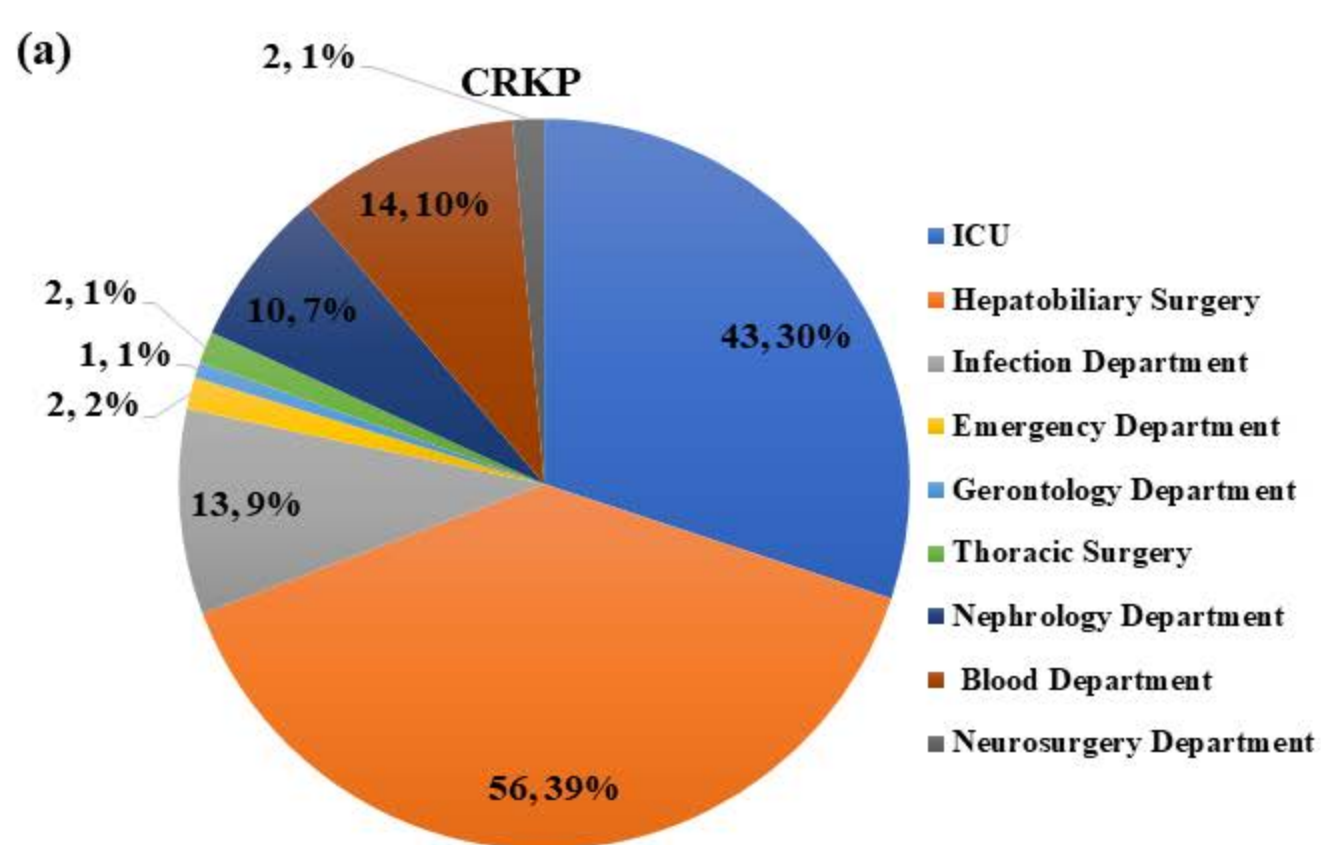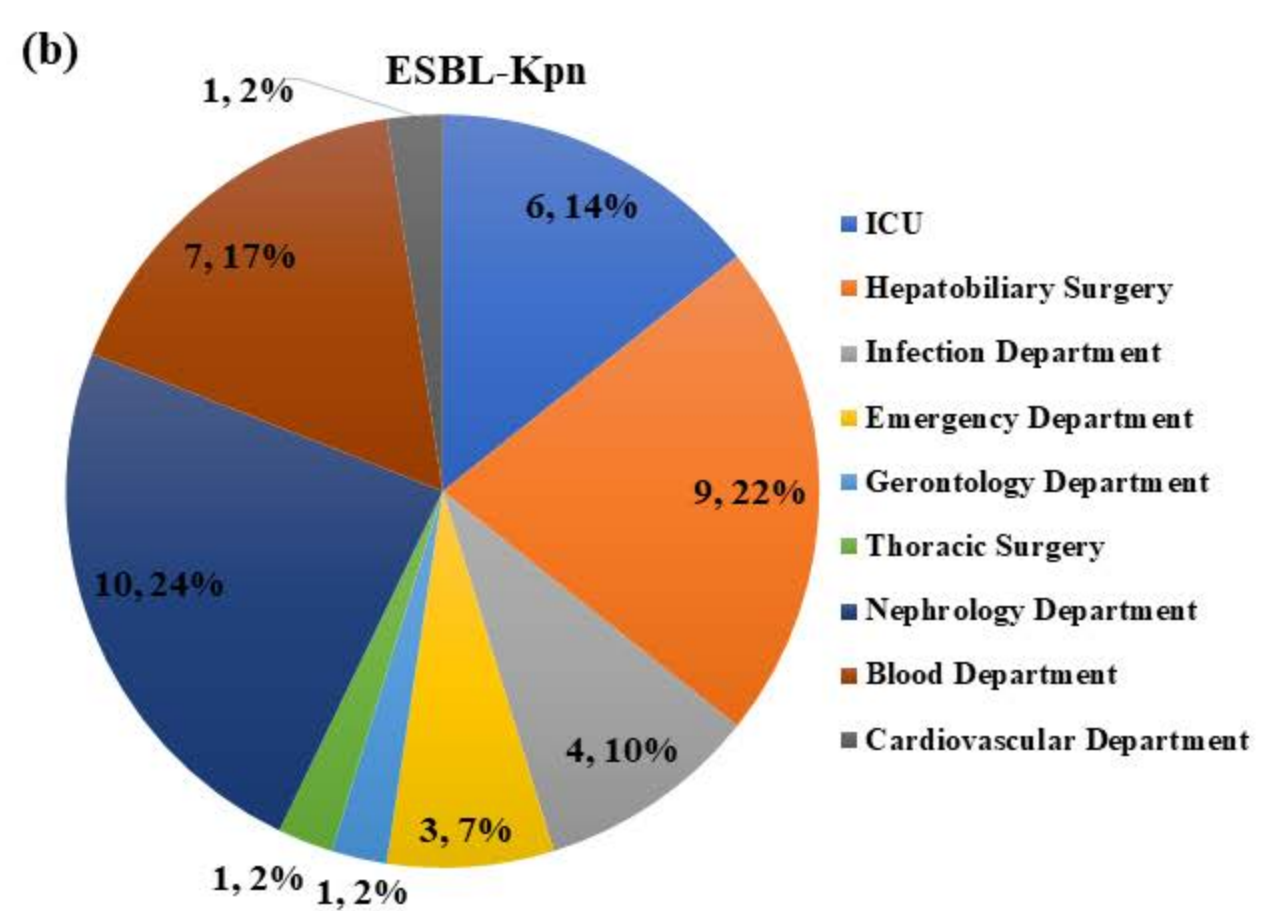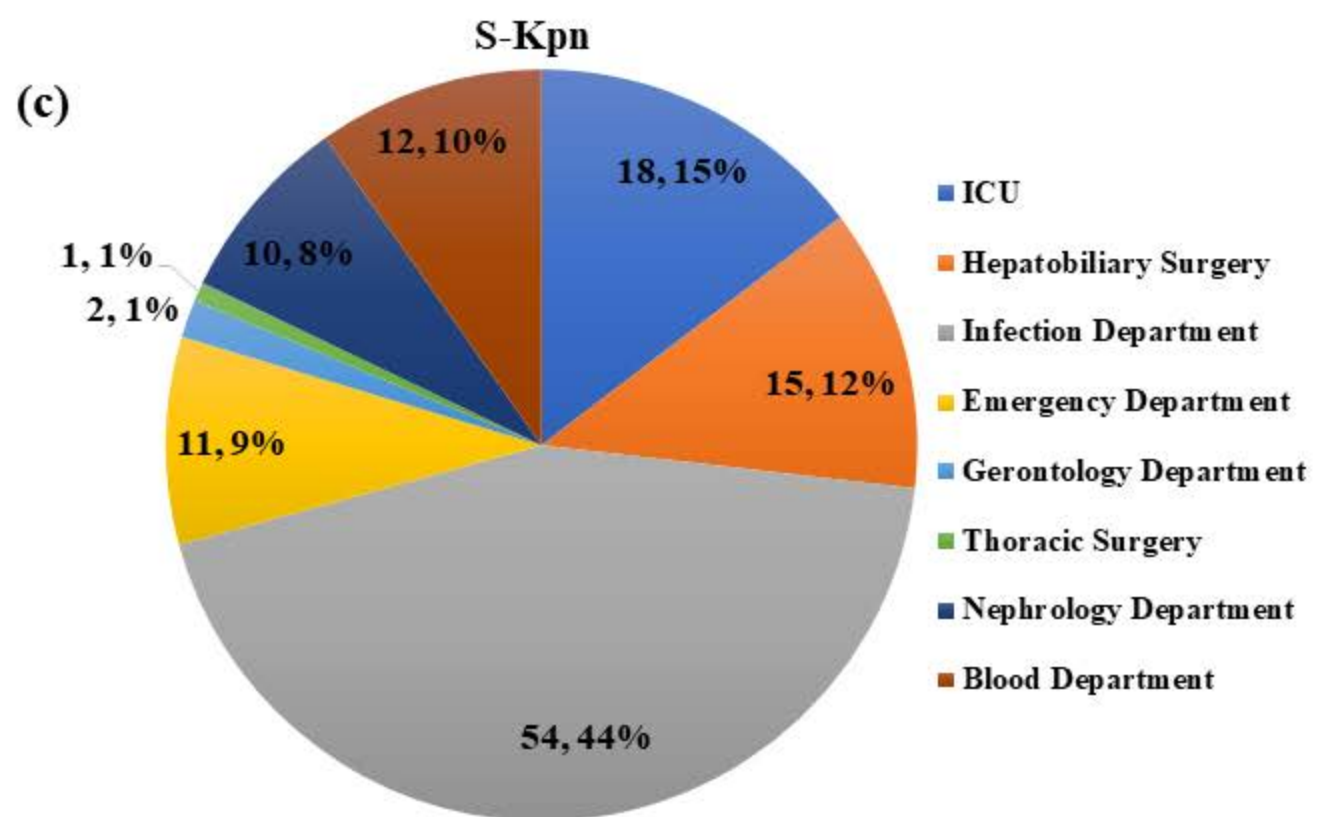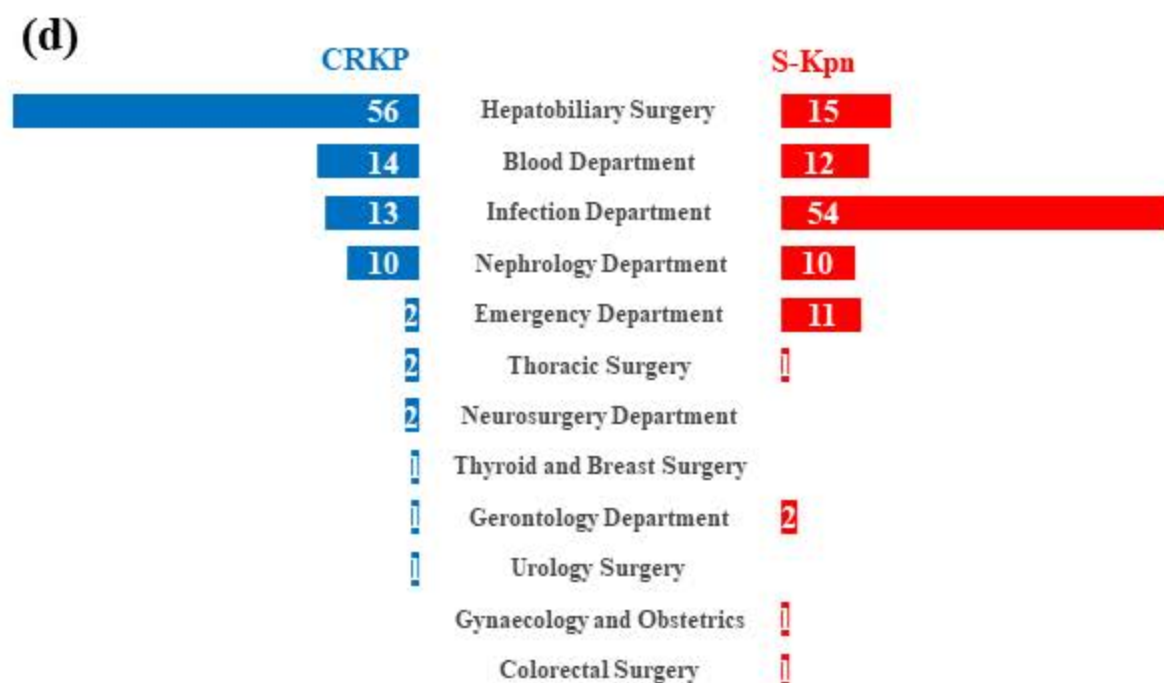

# ROC Curve

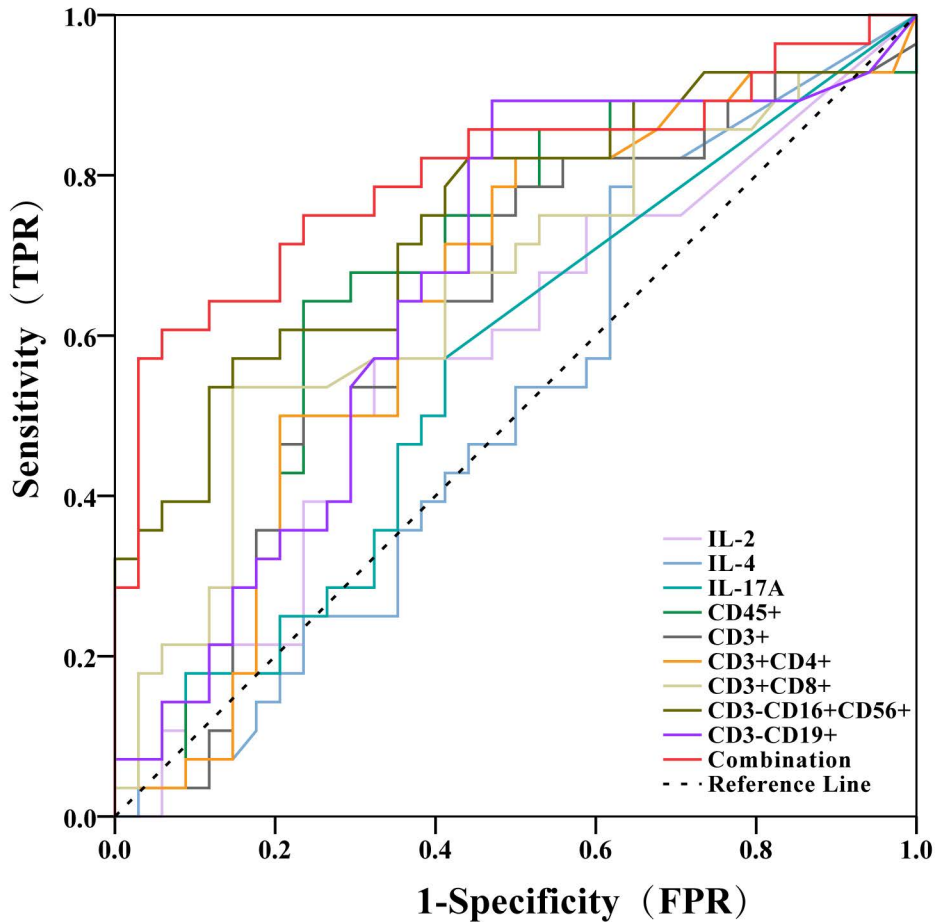

### **Supplementary Figure Legends**

**Supplementary Figure 1.** Departments in different BSIs-Kpn groups. (a) CRKP; (b) ESBL-Kpn; (c) S-Kpn; (d) Different departments between CRKP and S-Kpn.

**Supplementary Figure 2.** The AUCs of different cytokines alone or combined with immunocyte subpopulations for S-Kpn. The ROC curve plotted using SPSS.

**Supplementary Table 1.** Clinical data of all patients with BSIs-Kpn.

| <b>Parameter</b>                           | <b>CRKP (N=145)</b> | <b>ESBL-Kpn (N=43)</b> | <b>S-Kpn (N=125)</b> | <b>P-value</b> |
|--------------------------------------------|---------------------|------------------------|----------------------|----------------|
| Age (years)                                | 54±15               | 52±18                  | 55±15                | 0.507          |
| Gender, male, N (%)                        | 105 (72.4)          | 25 (58.1)              | 71.2 (71.2)          | 0.187          |
| Tumor, N (%)                               | 45 (31.0)           | 15 (34.9)              | 40 (32.0)            | 0.726          |
| White blood cell (10E9/L)                  | 9.1 (4.0-13.2)      | 7.8 (3.7-12.3)         | 9.4 (5.3-12.5)       | 0.682          |
| Neutrophil percentage (%)                  | 90.2 (81.2-94.6)    | 90.3 (81.6-94.0)       | 86.8 (77.5-93.1)     | 0.025          |
| Hypersensitivity C reactive protein (mg/L) | 75.7 (34.8-126.9)   | 87.4 (38.9-140.6)      | 79.6 (40.3-153.2)    | 0.455          |
| Procalcitonin (ng/ml)                      | 2.6 (0.8-7.6)       | 8.4 (0.6-12.5)         | 5.1 (0.9-16.2)       | 0.041          |

BSIs-Kpn, bloodstream infections caused by *K pneumoniae*; CRKP, Carbapenem-resistant *K. pneumoniae*; ESBL-Kpn, extended-spectrum  $\beta$ -lactamases (ESBL) producing *K. pneumoniae*; S-Kpn, non-CRKP or non-ESBL-Kpn.
